# Supplementary material for: Computed Tomography (CT)-Assisted 3D Cephalometry in Horses: Interincisal Angulation of Clinical Crowns
Source: PubMed Central journal article supplement (PMC7403475; doi:10.3389/fvets.2020.00434), 2020-07-29
Supplement: Table_1.pdf [file Table_1.pdf]

Suppl. Table 1. Randomised measurement order (A) and results of repeated IIA measures (B).

A

| Horse | Age (y) | Measurement order (horse) | Measuring day |    |    |    |    |    |    |   |    |    |
|-------|---------|---------------------------|---------------|----|----|----|----|----|----|---|----|----|
|       |         |                           | 1             | 2  | 3  | 4  | 5  | 6  | 7  | 8 | 9  | 10 |
| 1     | 4       | 1                         | 1             | 2  | 7  | 4  | 3  | 3  | 8  | 5 | 2  | 2  |
| 2     | 5       | 5                         | 5             | 5  | 1  | 1  | 5  | 2  | 9  | 6 | 10 | 1  |
| 3     | 6       | 2                         | 1             | 2  | 6  | 9  | 9  | 1  | 9  | 6 | 6  | 5  |
| 4     | 9       | 3                         | 6             | 3  | 3  | 4  | 6  | 4  | 7  | 7 | 9  | 9  |
| 5     | 11      | 8                         | 3             | 9  | 5  | 8  | 10 | 3  | 3  | 8 | 7  | 7  |
| 6     | 14      | 4                         | 9             | 5  | 10 | 6  | 7  | 6  | 10 | 1 | 8  | 8  |
| 7     | 15      | 9                         | 10            | 10 | 9  | 2  | 8  | 10 | 4  | 9 | 6  | 6  |
| 8     | 17      | 10                        | 7             | 8  | 2  | 10 | 1  | 5  | 8  | 3 | 3  | 3  |
| 9     | 19      | 7                         | 4             | 6  | 7  | 7  | 5  | 2  | 1  | 4 | 4  | 4  |
| 10    | 20      | 6                         | 8             | 4  | 8  | 1  | 4  | 7  | 2  | 5 | 10 | 10 |

B

| Horse | Opposing incisors | Measuring method | Repeated measures IIA ( $\alpha$ ) |       |       |       |       |       |       |       |       |       |
|-------|-------------------|------------------|------------------------------------|-------|-------|-------|-------|-------|-------|-------|-------|-------|
|       |                   |                  | 1                                  | 2     | 3     | 4     | 5     | 6     | 7     | 8     | 9     | 10    |
| 1     | 01                | LACC             | 153,5                              | 154,4 | 152,8 | 153,3 | 153,5 | 153,7 | 153,1 | 155,2 | 153,8 | 155,3 |
|       | 02                | LACC             | 149,0                              | 148,4 | 149,3 | 148,9 | 148,6 | 149,7 | 149,0 | 149,8 | 149,7 | 150,5 |
|       | 03                | LACC             | 123,0                              | 123,5 | 123,5 | 123,0 | 123,6 | 122,7 | 123,5 | 118,1 | 122,0 | 122,4 |
| 2     | 03                | LPB*             | -                                  | -     | -     | -     | -     | -     | -     | -     | -     | -     |
|       | 01                | LACC             | 147,9                              | 146,4 | 148,6 | 147,2 | 148,0 | 147,7 | 147,7 | 147,7 | 148,0 | 148,3 |
|       | 02                | LACC             | 144,0                              | 146,0 | 144,7 | 144,9 | 146,9 | 144,6 | 145,0 | 145,4 | 145,4 | 144,9 |
| 3     | 03                | LACC             | 148,0                              | 150,2 | 148,1 | 148,3 | 149,9 | 149,7 | 149,0 | 148,1 | 148,6 | 149,2 |
|       | 03                | LPB              | 126,2                              | 128,6 | 134,1 | 127,1 | 132,5 | 133,6 | 129,7 | 134,1 | 134,0 | 133,6 |
|       | 01                | LACC             | 140,6                              | 139,5 | 138,9 | 139,5 | 138,3 | 140,9 | 139,6 | 139,3 | 139,4 | 138,7 |
| 4     | 02                | LACC             | 137,7                              | 135,6 | 136,1 | 136,3 | 135,2 | 135,3 | 136,1 | 135,4 | 135,9 | 134,3 |
|       | 03                | LACC             | 120,4                              | 119,9 | 119,5 | 119,8 | 120,2 | 120,4 | 120,3 | 119,0 | 120,1 | 120,7 |
|       | 03                | LPB              | 111,6                              | 113,0 | 113,2 | 113,0 | 112,5 | 109,7 | 112,4 | 109,8 | 110,2 | 115,0 |
| 5     | 01                | LACC             | 131,6                              | 131,7 | 131,2 | 131,7 | 130,5 | 132,0 | 131,7 | 131,3 | 131,6 | 132,5 |
|       | 02                | LACC             | 131,0                              | 129,6 | 130,3 | 130,0 | 130,3 | 131,6 | 130,4 | 131,3 | 130,2 | 130,9 |
|       | 03                | LACC             | 123,1                              | 123,5 | 124,6 | 123,5 | 124,0 | 124,7 | 123,8 | 124,8 | 124,4 | 123,8 |
| 6     | 03                | LPB              | 116,4                              | 117,6 | 120,5 | 117,0 | 118,3 | 120,2 | 117,8 | 118,0 | 118,2 | 116,8 |
|       | 01                | LACC             | 139,3                              | 137,1 | 136,9 | 137,0 | 136,6 | 137,5 | 137,3 | 135,9 | 136,7 | 138,6 |
|       | 02                | LACC             | 132,9                              | 132,0 | 131,7 | 132,1 | 131,4 | 131,0 | 131,4 | 130,3 | 131,4 | 130,8 |
| 7     | 03                | LACC             | 122,5                              | 122,4 | 122,0 | 122,4 | 122,3 | 122,9 | 122,5 | 122,3 | 122,0 | 122,1 |
|       | 03                | LPB              | 126,6                              | 128,3 | 128,5 | 127,9 | 128,3 | 131,3 | 128,1 | 130,2 | 129,8 | 128,2 |
|       | 01                | LACC             | 146,8                              | 148,4 | 147,3 | 147,2 | 145,4 | 147,7 | 147,4 | 146,3 | 147,0 | 149,0 |
| 8     | 02                | LACC             | 139,9                              | 141,2 | 139,2 | 140,0 | 139,7 | 140,3 | 140,3 | 139,8 | 140,2 | 140,5 |
|       | 03                | LACC             | 115,6                              | 118,0 | 115,1 | 115,5 | 115,1 | 117,2 | 116,7 | 116,1 | 116,0 | 115,2 |
|       | 03                | LPB              | 109,9                              | 111,1 | 111,7 | 110,8 | 112,9 | 111,3 | 110,9 | 112,0 | 111,5 | 110,8 |
| 9     | 01                | LACC             | 109,8                              | 109,9 | 110,4 | 110,0 | 110,8 | 109,6 | 110,6 | 111,1 | 110,1 | 110,9 |
|       | 02                | LACC             | 109,8                              | 108,4 | 108,7 | 109,1 | 108,0 | 109,2 | 108,9 | 110,4 | 108,8 | 109,7 |
|       | 03                | LACC             | 87,8                               | 87,8  | 86,7  | 87,6  | 88,0  | 87,5  | 87,6  | 87,3  | 87,8  | 87,3  |
| 10    | 03                | LPB              | 71,7                               | 70,4  | 74,7  | 71,0  | 72,5  | 71,2  | 72,9  | 72,2  | 72,0  | 72,3  |
|       | 01                | LACC             | 121,0                              | 121,0 | 121,1 | 121,1 | 121,1 | 121,5 | 121,4 | 120,1 | 121,2 | 120,1 |
|       | 02                | LACC             | 123,4                              | 122,0 | 122,2 | 122,4 | 122,9 | 122,2 | 122,3 | 123,1 | 122,6 | 123,5 |
| 1     | 03                | LACC             | 112,2                              | 112,4 | 114,3 | 112,8 | 114,7 | 116,0 | 113,8 | 113,6 | 113,5 | 114,3 |
|       | 03                | LPB              | 100,4                              | 101,7 | 102,2 | 101,5 | 98,7  | 101,6 | 100,9 | 100,6 | 100,0 | 99,2  |
|       | 01                | LACC             | 120,3                              | 117,6 | 121,3 | 119,8 | 120,0 | 118,3 | 119,8 | 119,0 | 119,7 | 123,8 |
| 2     | 02                | LACC             | 123,9                              | 120,8 | 120,2 | 120,2 | 121,3 | 119,9 | 120,9 | 119,6 | 121,0 | 121,1 |
|       | 03                | LACC             | 109,7                              | 107,2 | 107,8 | 108,0 | 108,4 | 110,5 | 109,0 | 108,9 | 109,3 | 110,1 |
|       | 03                | LPB              | 98,3                               | 95,8  | 98,6  | 98,0  | 99,0  | 100,6 | 98,8  | 95,4  | 98,9  | 97,4  |
| 3     | 01                | LACC             | 119,6                              | 117,0 | 119,2 | 119,1 | 117,2 | 118,6 | 119,4 | 119,6 | 119,5 | 119,6 |
|       | 02                | LACC             | 113,2                              | 113,1 | 111,8 | 112,2 | 114,1 | 113,4 | 113,0 | 112,4 | 112,7 | 113,4 |
|       | 03                | LACC             | 100,3                              | 102,1 | 101,7 | 101,7 | 102,6 | 103,6 | 102,4 | 98,9  | 101,4 | 103,5 |
| 4     | 03                | LPB              | 89,8                               | 88,5  | 91,3  | 90,0  | 88,9  | 91,3  | 90,2  | 91,3  | 91,1  | 91,5  |

LACC, labial axis of clinical crown: newly described measuring method; LPB, lingual and palatal border: reference method for corner incisors; \* The short and irregular lingual and palatal surface of the deciduous upper jaw incisor clinical crown did not allow accurate definition of a clinical crown axis, hence determination of the IIA was not possible.
